# Supplementary material for: Therapeutic modulation of phagocytosis in glioblastoma can activate both innate and adaptive antitumour immunity
Source: Springer Nature journal article supplement (doi:10.1038/s41467-020-15129-8), 2020-03-20
Supplement: 41467_2020_15129_MOESM1_ESM.pdf [file 41467_2020_15129_MOESM1_ESM.pdf]

**Therapeutic modulation of phagocytosis in glioblastoma can activate both innate and adaptive antitumour immunity**

Von Roemeling et al.

## SUPPLEMENTARY FIGURES

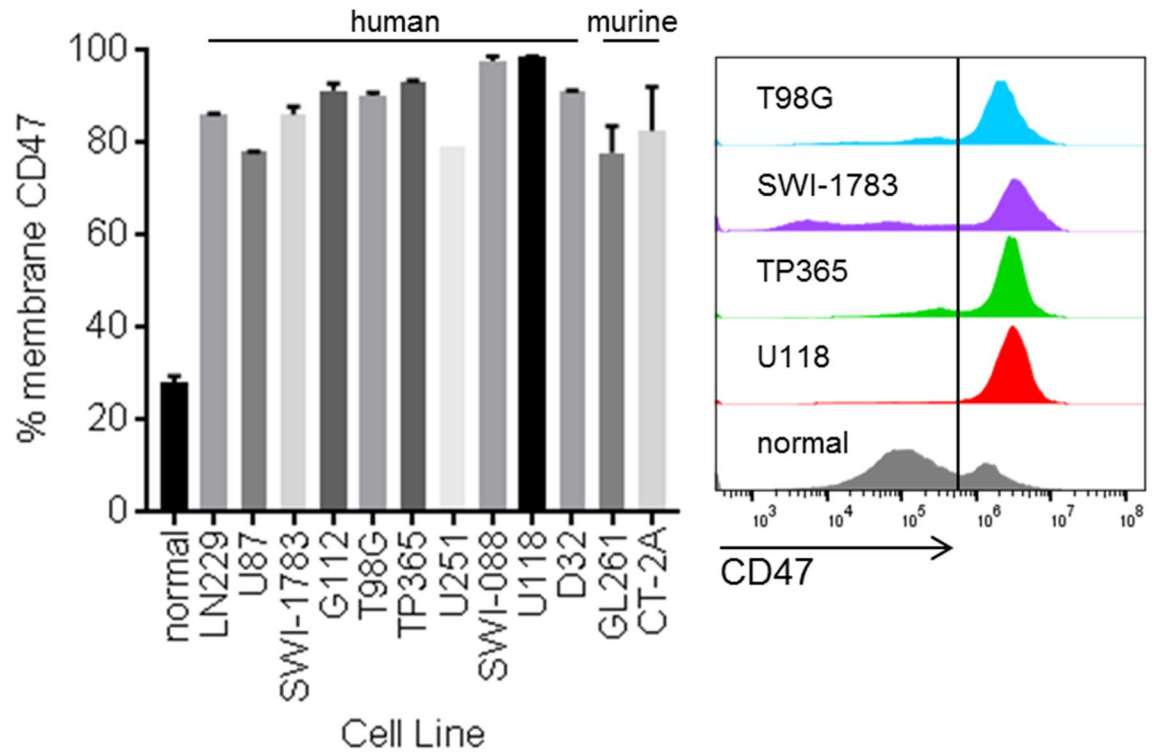

**Supplementary Figure 1:** CD47 is highly expressed in both human and mouse GBM cell lines. More than 80% of cells are positive for CD47 based on flow cytometry analysis.  $n=2$ , error bar = mean  $\pm$  standard deviation. Normal: primary astrocytes isolated from normal brain tissue samples after temporal lobectomy for epilepsy surgery.

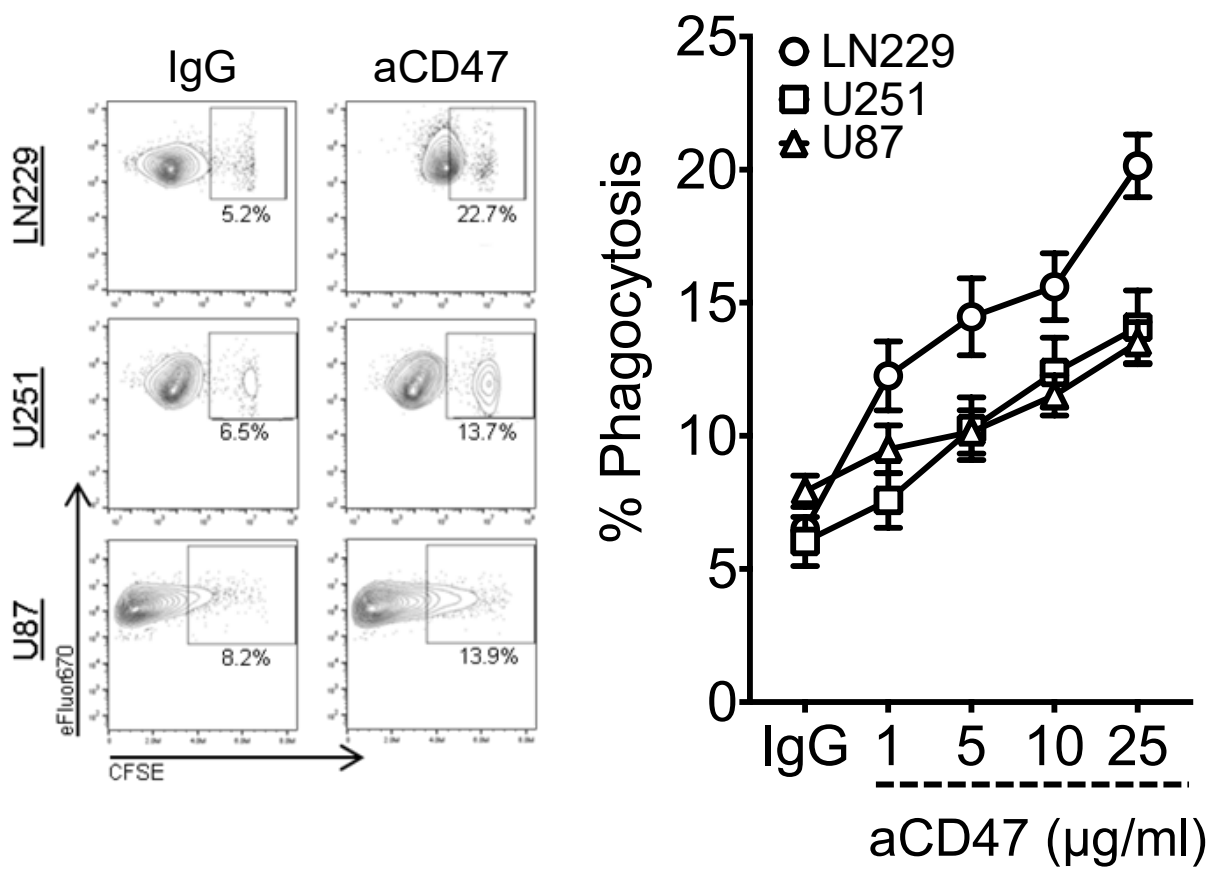

**Supplementary Figure 2:** Anti-CD47 antibody (aCD47, clone B6H12) treatment increased the phagocytosis of human GBM cells by human THP-1 cells. Representative results are shown in the left panel. n=6, error bar = mean  $\pm$  standard deviation.

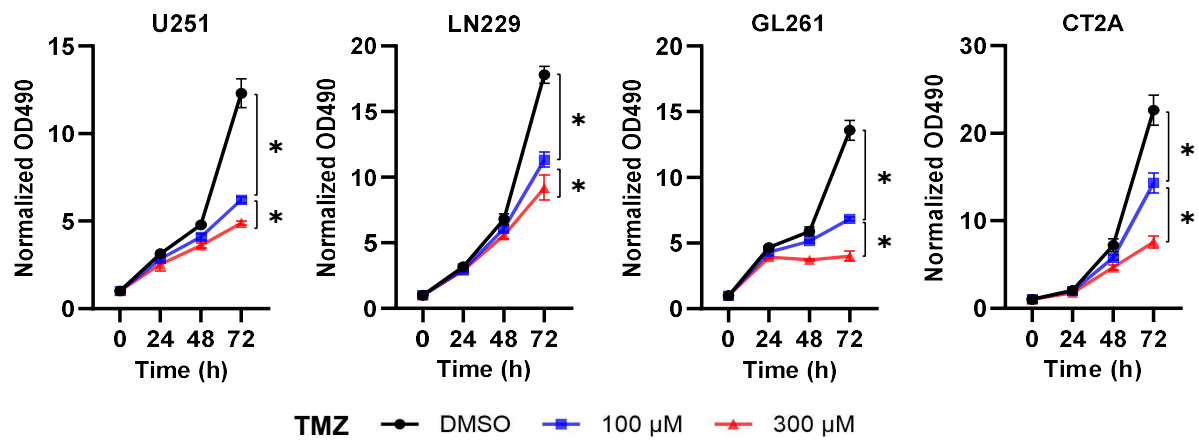

**Supplementary Figure 3:** Growth inhibitory effect of TMZ on glioma cells. n=3, error bar = mean ± standard deviation. \*p < 0.05, unpaired Student's t test.

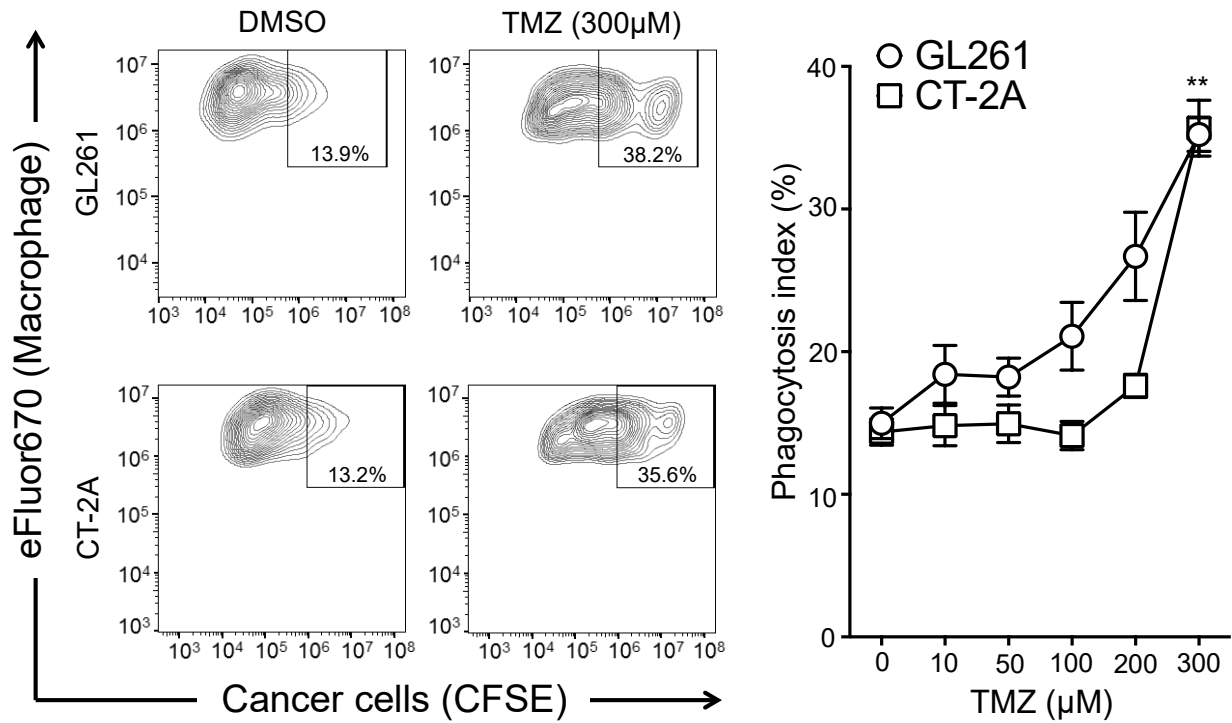

**Supplementary Figure 4:** TMZ treatment promotes phagocytosis of murine GBM cells by mouse bone marrow derived phagocytes. n=6, error bar = mean ± standard deviation. \*\*p<0.01, compared to 0 μM, unpaired Student's t test.

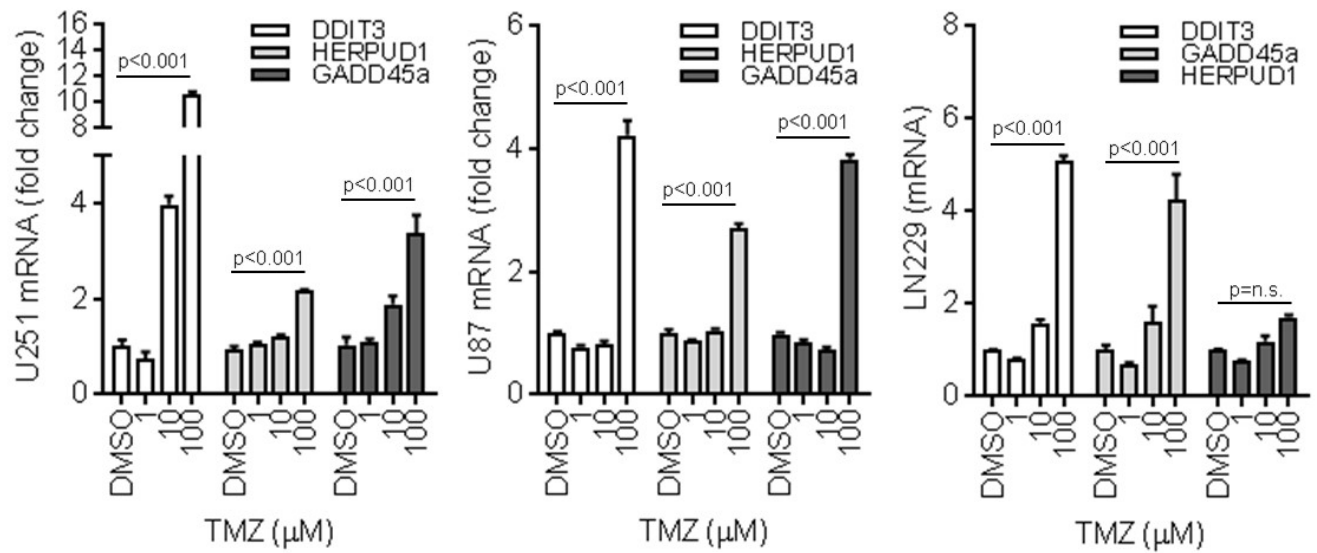

**Supplementary Figure 5:** TMZ treatment up-regulated the mRNA expression of ER response-associated targets DDIT3, HERPUD1 and GADD45 $\alpha$  in human GBM cells. n=3, error bar = mean  $\pm$  standard deviation, unpaired Student's t-test.

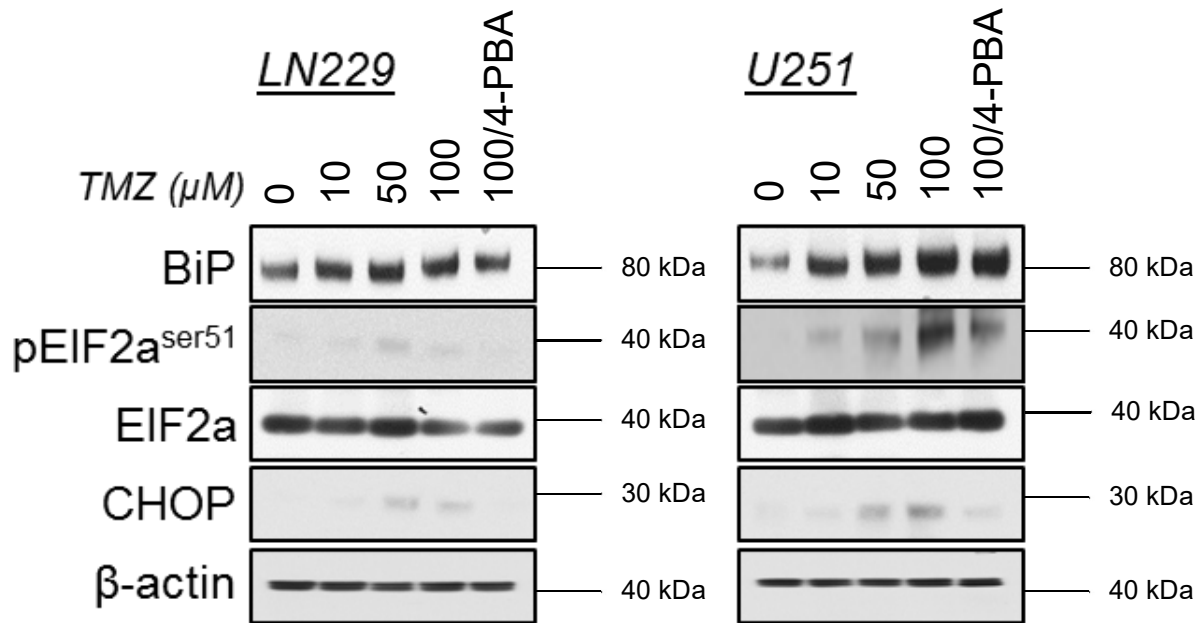

**Supplementary Figure 6:** Western blot showing TMZ treatment increased the expression levels of ER stress response-specific protein BiP, phospho-EIF2 $\alpha$  and CHOP in mouse GBM cells, a response that is decreased by the addition of the ER stress inhibitor 4-PBA.

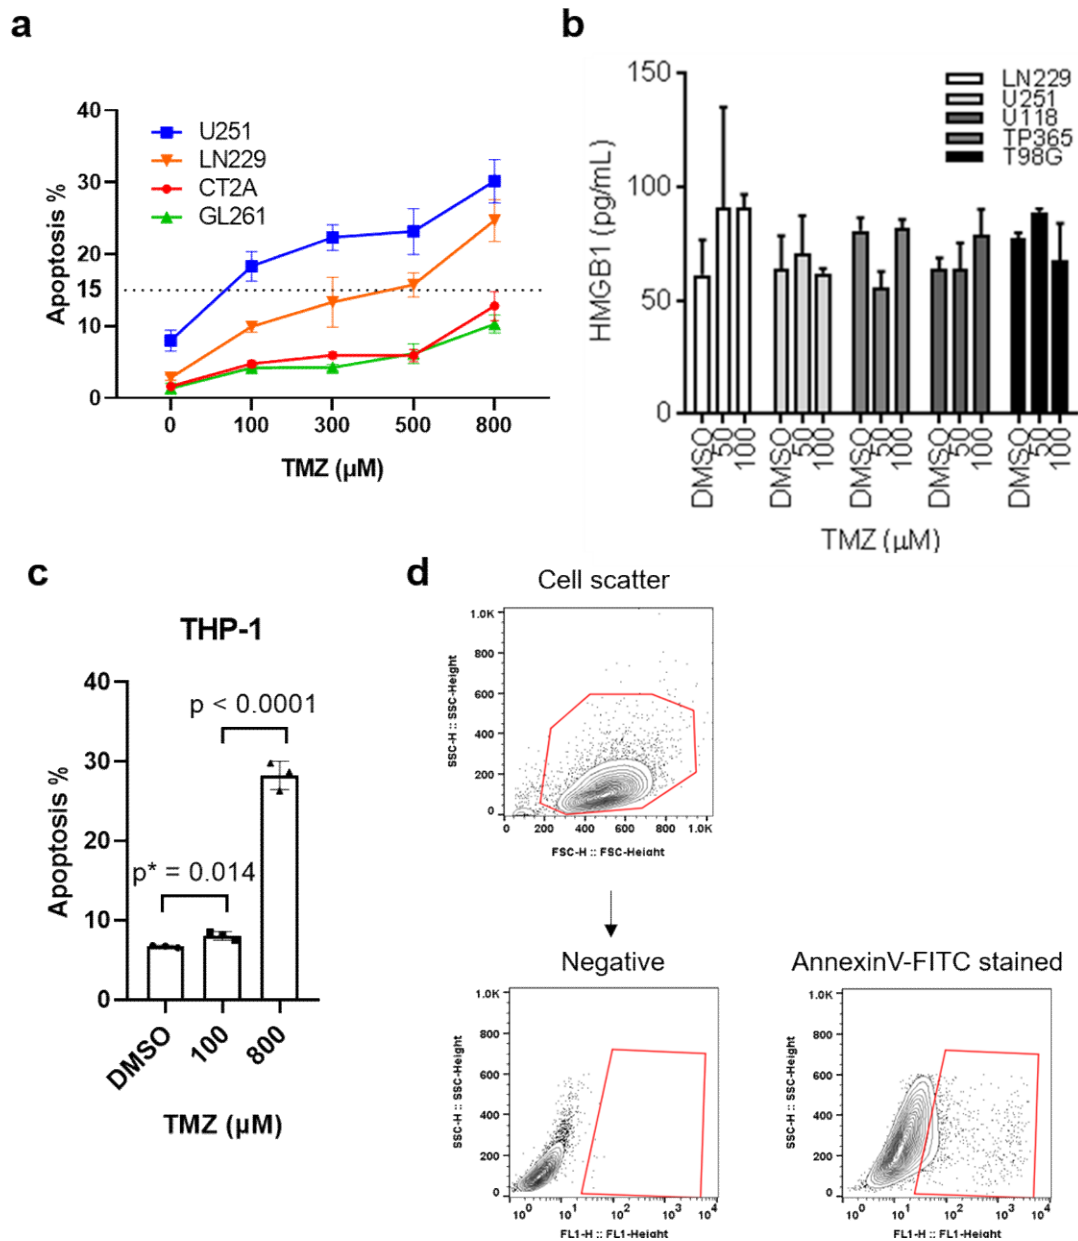

**Supplementary Figure 7: TMZ induces apoptosis at high doses.** a) TMZ treatment for 72 hours did not induce severe apoptotic cell death in mouse and human GBM cells until the dose exceeded 500 μM. n=3 b) TMZ treatment did not result in significant increase in the release of HMGB1 from human GBM cells. n=2, error bar = mean ± standard deviation. c) High dose TMZ treatment for 72 hours induced apoptosis in THP-1 cells. n=3, error bar = mean ± standard deviation. P-values were calculated by the student's t-test. d) Representative gating strategy to determine apoptotic cells by flow cytometry.



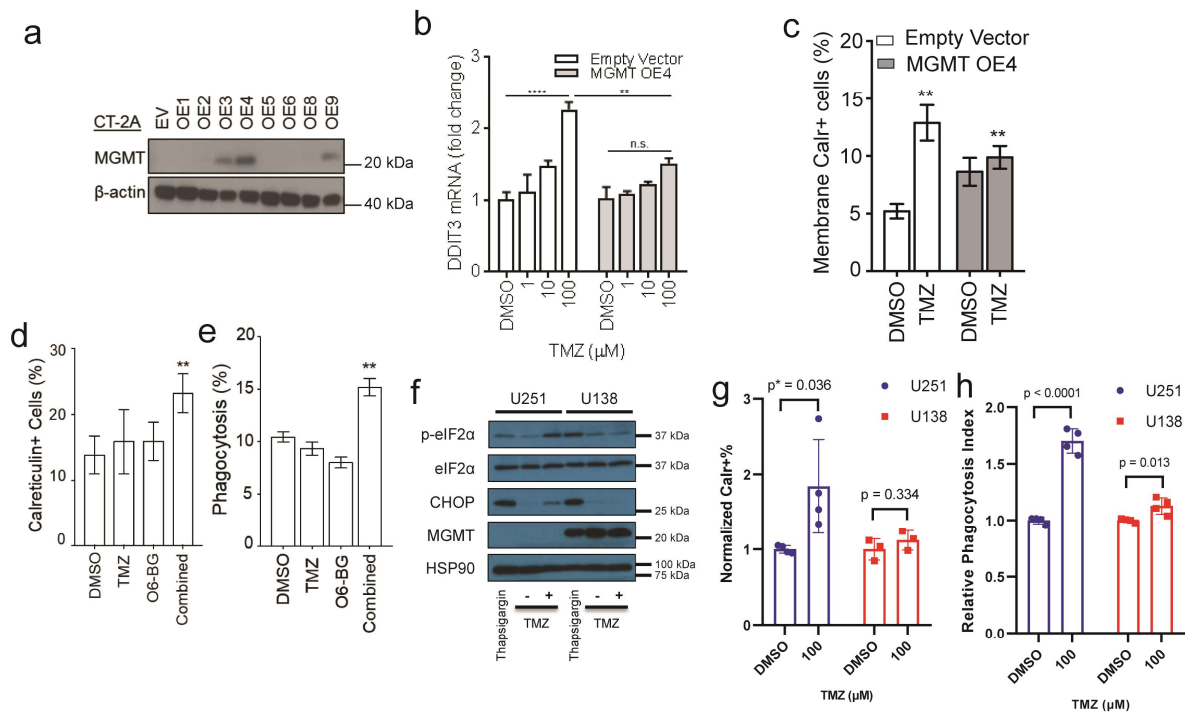

**Supplementary Figure 8: TMZ-induced ER-stress depends on MGMT deficiency.** a) Induced-expression of MGMT in murine GBM cells (CT-2A) significantly reduced TMZ-mediated upregulation of DDIT3 b), and the translocation of calreticulin (Calr) to the plasma membrane. n=3 c). The MGMT overexpressing clone (OE4) was selected for testing. n=6, error bar = mean  $\pm$  standard deviation. \*\*p<0.05, between empty vector and MGMT OE4 groups, unpaired Student's t test. \*\*\*\*<0.01, by one way ANOVA. d-e) Addition of O<sup>6</sup>-benzylguanine (O6BG), a synthetic derivative of guanine and substrate competitor for MGMT methyltransferase activity restored TMZ-induced calreticulin translocation and phagocytosis response in murine MGMT overexpressing (OE4) GBM cells. n=6, error bar = mean  $\pm$  standard deviation. \*\*p<0.01, compared with TMZ alone, unpaired Student's t test. f) TMZ treatment upregulated of ER-stress markers of U251 cell line, but not of U138. g) TMZ treatment enhanced more calreticulin translocation (U251, n=4, U138, n=3) and h) phagocytosis of the U251 than U138 cells (n=4), error bar = mean  $\pm$  standard deviation, unpaired Student's t test.

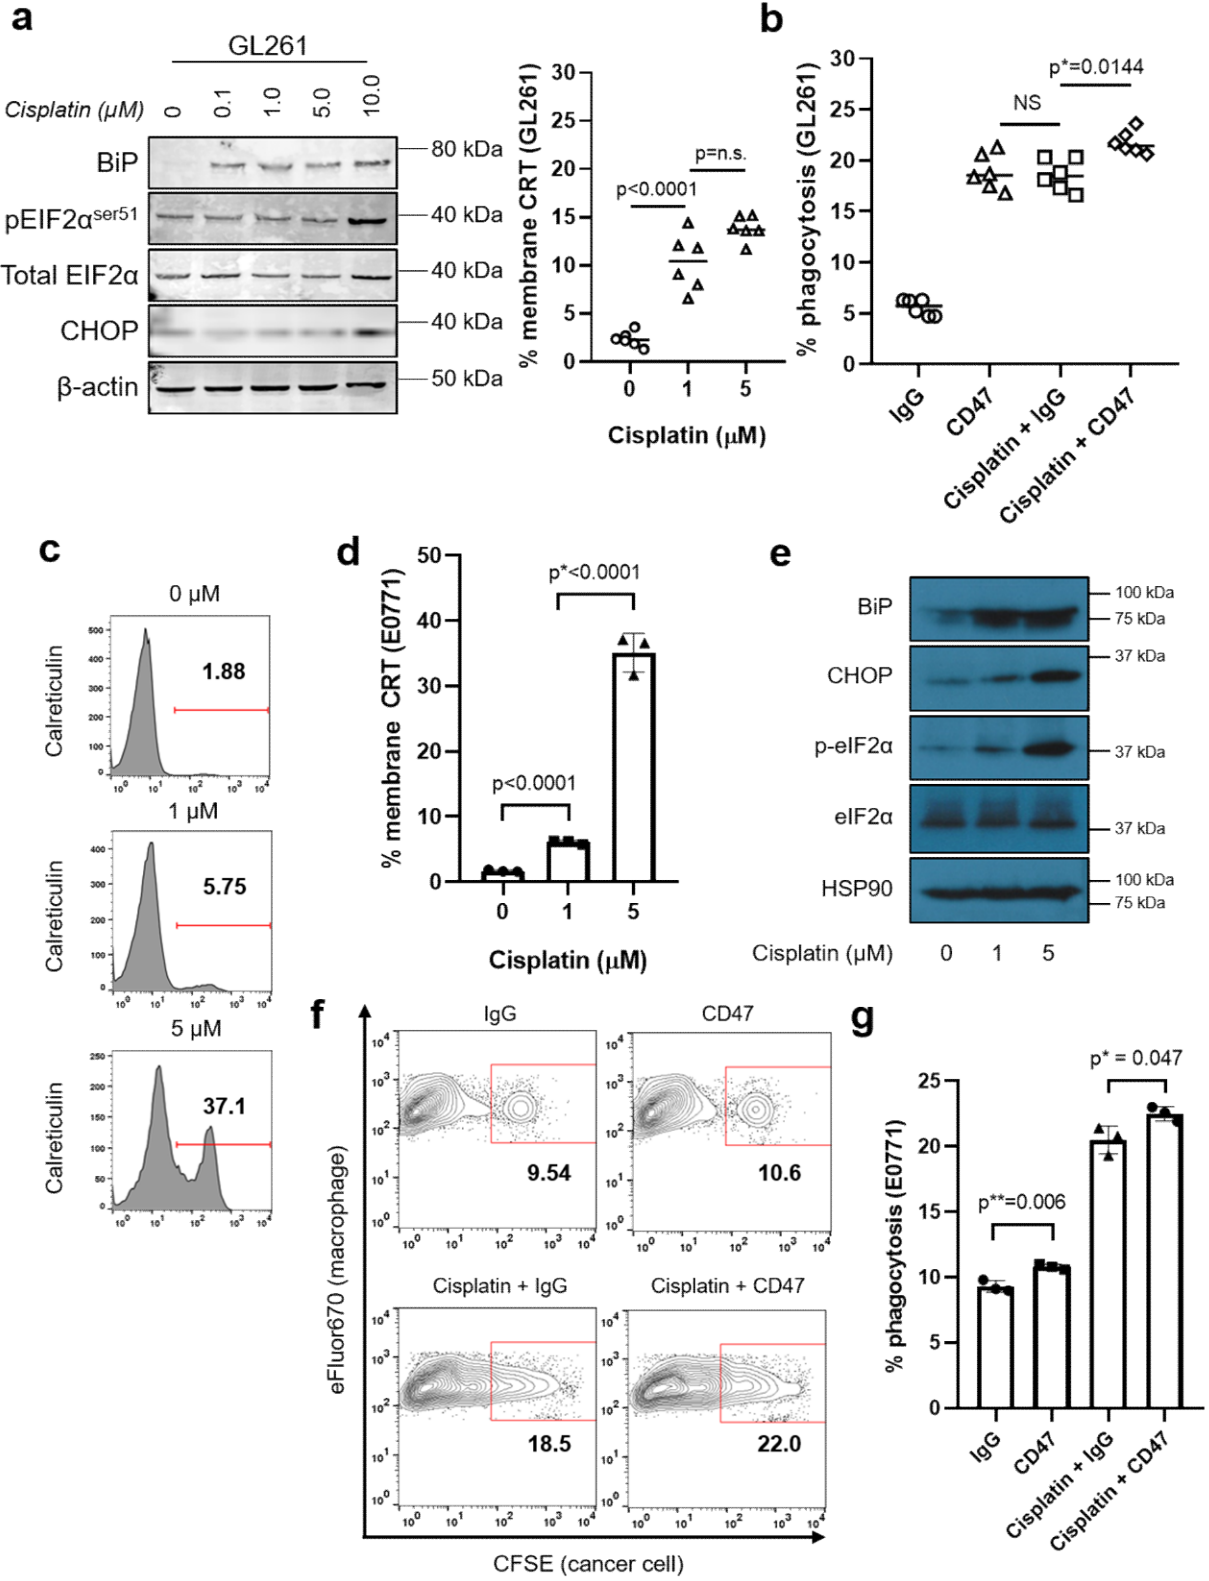

**Supplementary Figure 9:** Cisplatin induces ER-stress in GBM and breast cancer cells. a) Western blot of ER-stress markers (left) and calreticulin translocation (right) of GL261 cell line after 48 hours of cisplatin treatment. n=6. b) Phagocytosis of GL261 by BM cells was enhanced by cisplatin (1  $\mu$ M) and/or anti-CD47 treatment. n=6. c-d) Cisplatin treatment for 48 hours induced calreticulin translocation. n=3. e) Cisplatin treatment induced ER-stress markers upregulation of breast cancer cell line E0771. f,g) Phagocytosis of E0771 by BM cells was enhanced by cisplatin (1  $\mu$ M) and/or anti-CD47 treatment. n=3 error bar = mean  $\pm$  standard deviation, unpaired Student's t test.

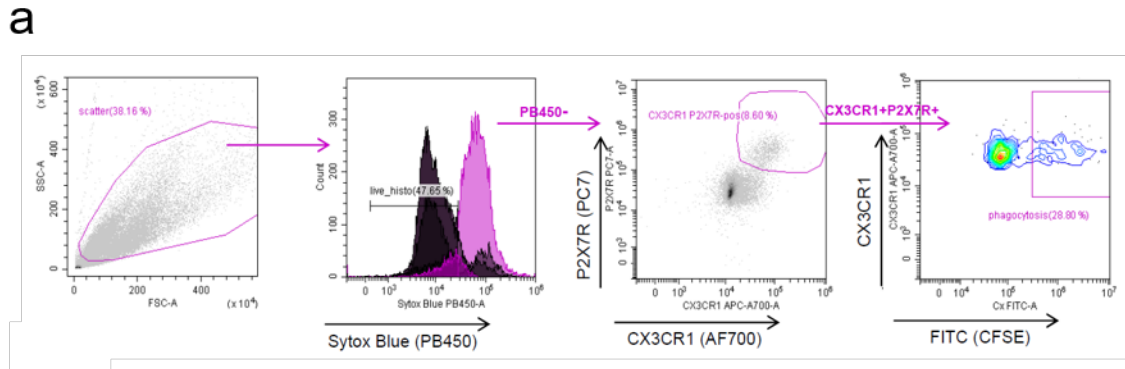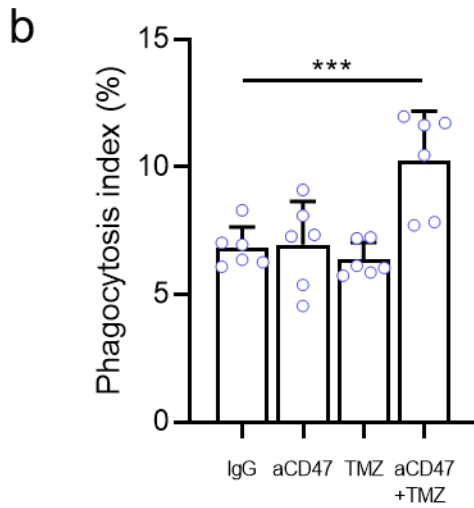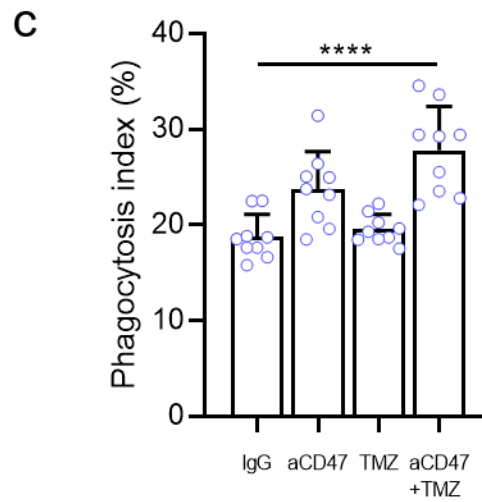

**Supplementary Figure 10:** Combined TMZ and anti-CD47 treatment promotes phagocytosis of murine GBM cells by mouse primary microglia. a) Gating strategy for isolating primary microglia. b) Phagocytosis assay in CT-2A (n=6) and c) GL261 (n=9) cells. Error bar = mean  $\pm$  standard deviation. P-value obtained using one-way ANOVA adjusted for multiple comparisons using Tukey's method.

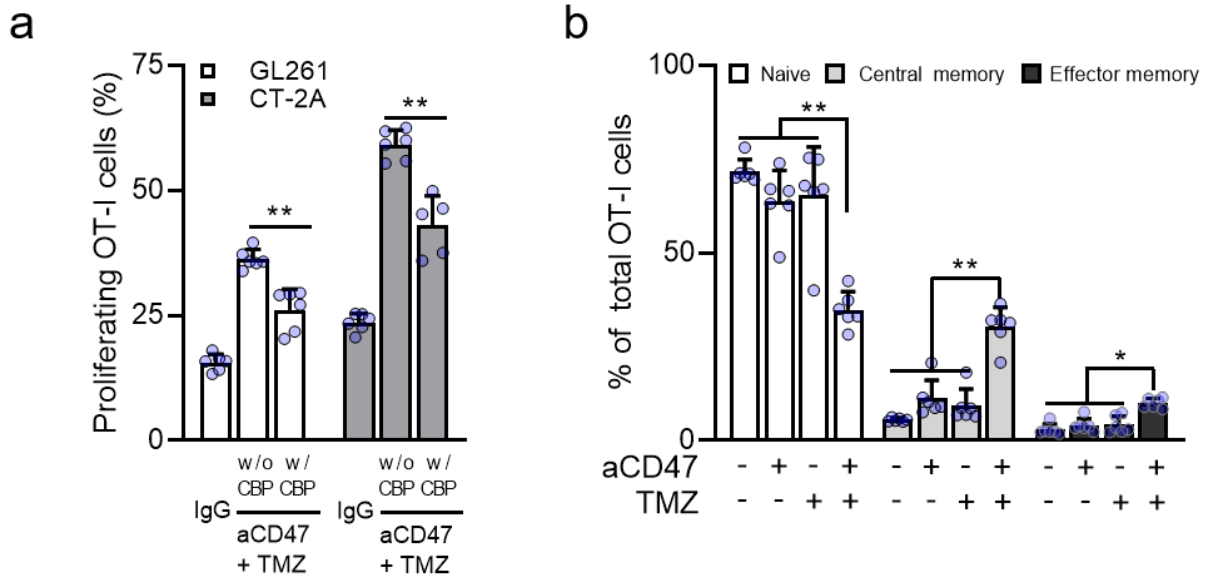

**Supplementary Figure 11:** Combined anti-CD47 and TMZ treatment enhances T cell priming. a) Blocking of Calreticulin by a blocking peptide (CBP) significantly inhibited the cross-priming of OT-I T cells by BM APCs in the setting of anti-CD47 antibody and TMZ treatment for murine cOVA-transduced GBM cells.  $n=6$ , error bar = mean  $\pm$  standard deviation.  $**p<0.01$ , unpaired Student's  $t$  test. b) Enhanced cross-priming effect was observed with combination anti-CD47 antibody and TMZ treatment (in GL261-cOVA cells) resulted in a shift of naïve OT-I T cells towards memory phenotypes.  $n=6$ , error bar = mean  $\pm$  standard deviation.  $**p<0.01$ , compared with monotherapy groups, unpaired Student's  $t$  test.

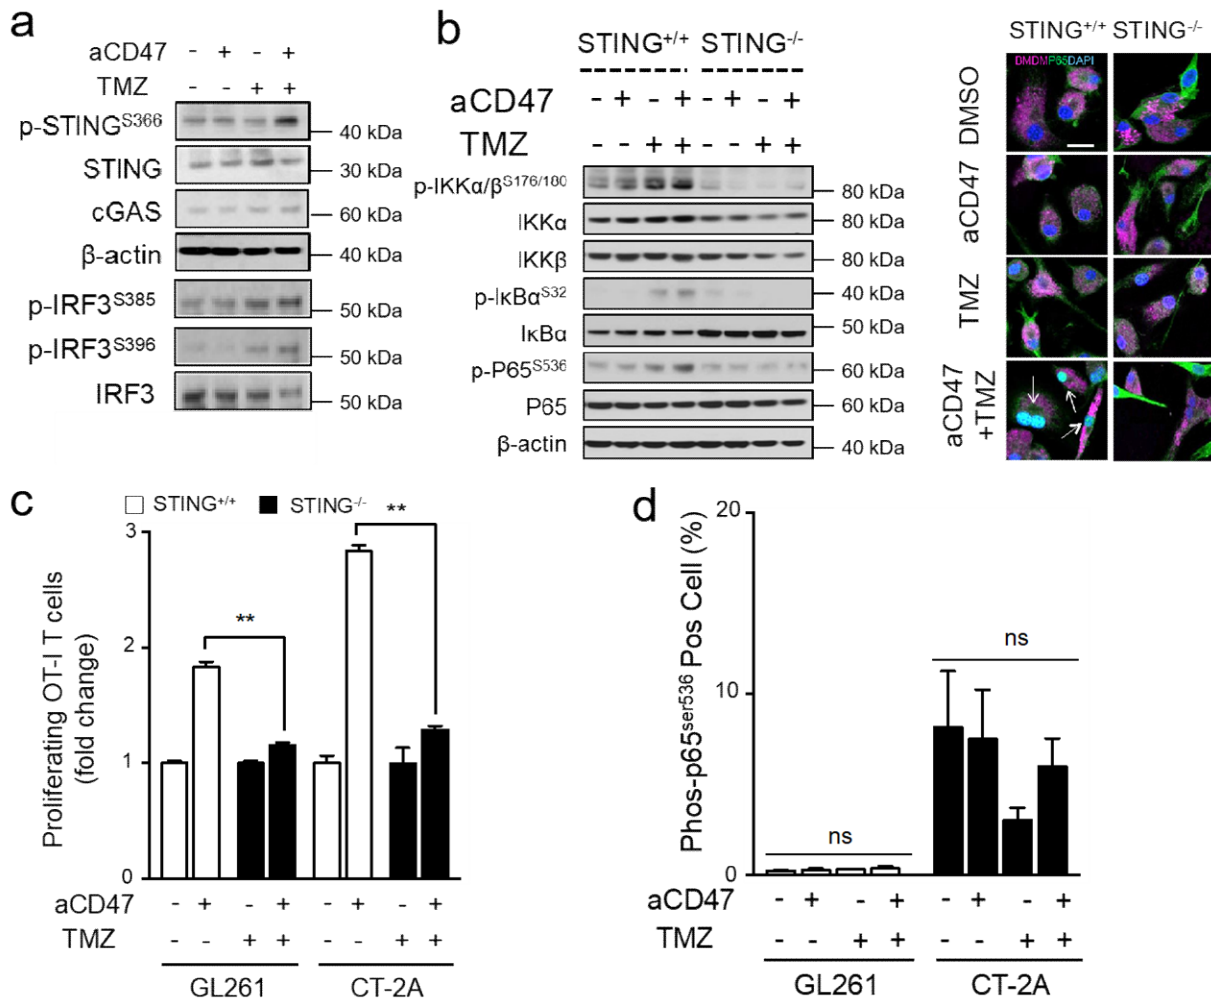

**Supplementary Figure 12:** Combined anti-CD47 antibody and TMZ treatment against mouse GBM cells activates cGAS-STING cytosolic DNA sensing pathway in murine BM APCs. a) Western blot of CT-2A cells after treatment. b) Phosphorylation and nuclear translocation of p65 subunit of NF-κB in the setting of combined anti-CD47 antibody and TMZ treatment in CT-2A cells are diminished in STING-deficient *Tmem173*<sup>gt</sup> BM APCs. c) Deficiency of STING abrogated the ability of APCs to cross-prime T cells after incubating with anti-cd47 antibody and TMZ treated cOVA-transduced murine GBM cells. n=5. d) Phosphorylation of p65 is minimal and non-significant in tumour cells with combination treatment. n=4, error bar = mean ± standard deviation. \*\*p<0.01, for indicated comparisons, ns= not significant.

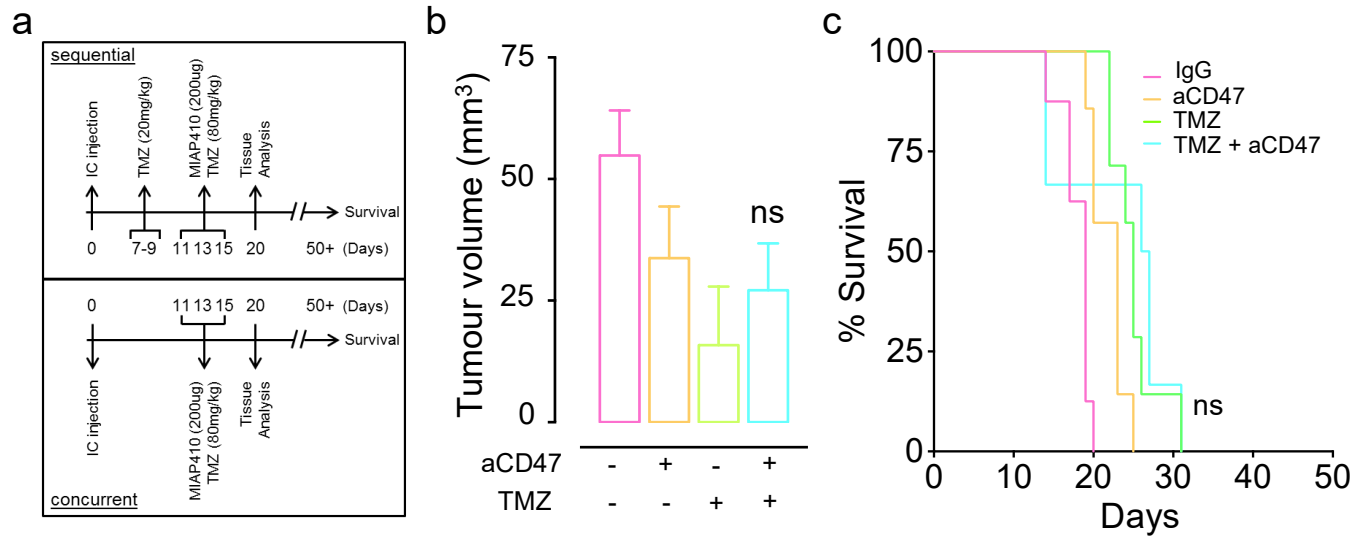

**Supplementary Figure 13:** Effect of combined anti-CD47 and TMZ treatment on murine GBM models. a) Treatment schema for concurrent and sequential combination therapy with anti-CD47 antibody and TMZ treatment of GL261 model. Concurrent anti-CD47 antibody and TMZ treatment did not result in improved tumour growth inhibition (n=5) b) or animal survival (n=8 in control group, n=7 in other groups) c) against TMZ or anti-CD47 antibody treatment alone, error bar = mean  $\pm$  standard deviation, ns = not significant. Unpaired Student's t test for b), Log-rank test for c).

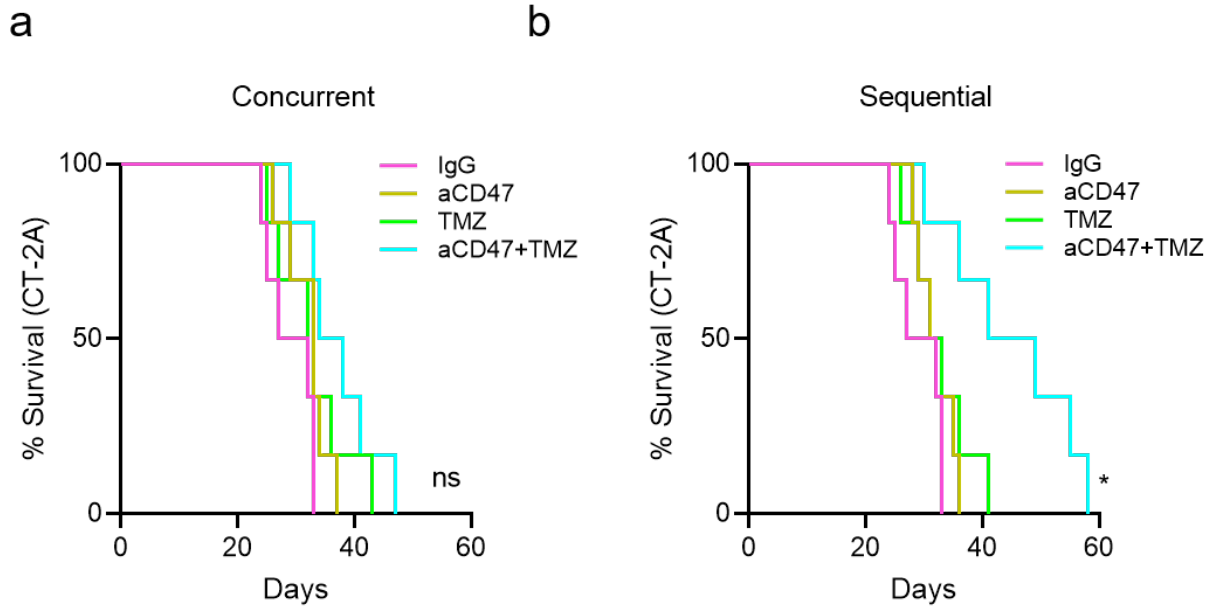

**Supplementary Figure 14:** Survival plot of CT-2A tumour bearing mice treated with concurrent (a) or sequential (b) regimen of combined anti-CD47 antibody and TMZ therapy. n=6, ns = not significant, \*\*p<0.01, Log-rank test.



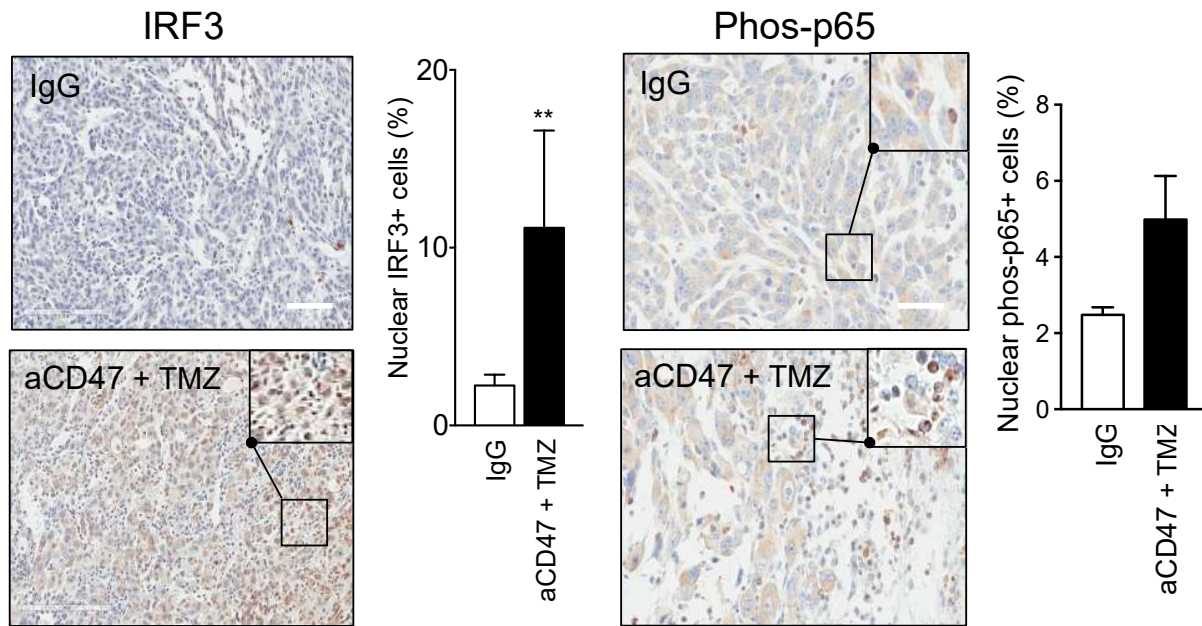

**Supplementary Figure 15:** Combined anti-CD47 antibody and TMZ treatment increased the level of nuclear IRF3 (n=5) and phosphorylated p65 (n=6 in the control group, n=5 in the aCD47+TMZ group) in vivo. Scale bar = 100 $\mu$ m. Bar graph = quantified data of 10 representative areas from tumour samples. Error bar = mean  $\pm$  standard deviation. \*\*p<0.01, Student's t test.

Supplementary Figure 16: Uncropped original gel images of western blots.

Fig 2F

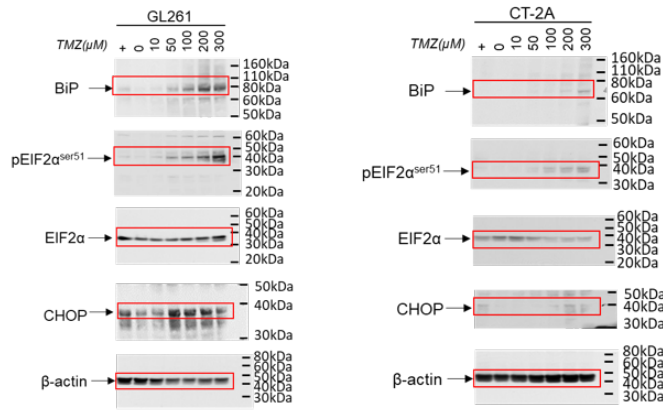

Fig 4b

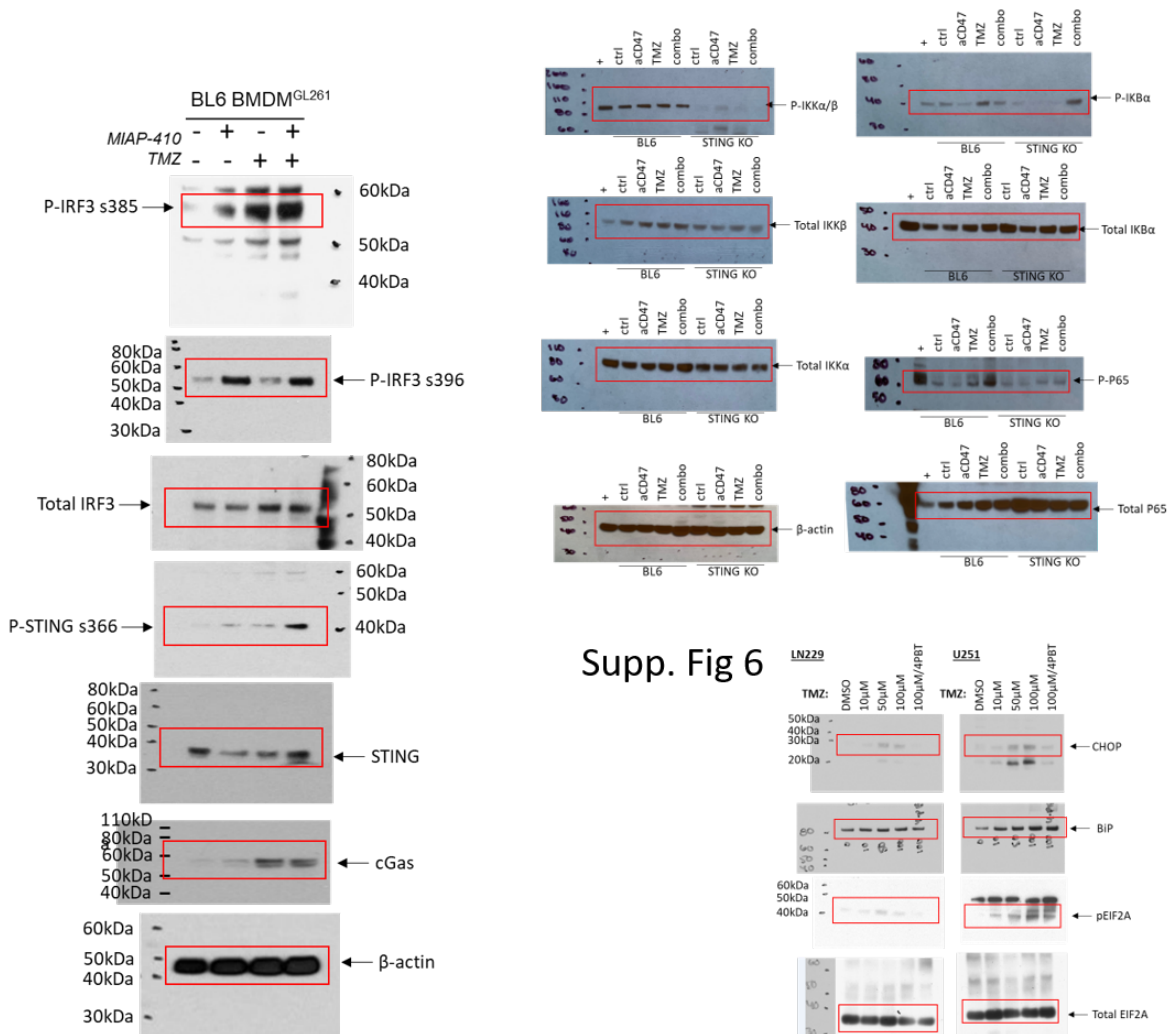

Supp. Fig 6

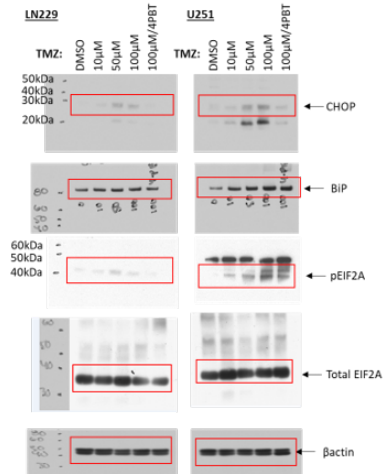

**Supplementary Figure 16 (continued):** Uncropped original gel images of western blots.

Supp. Fig. 8a

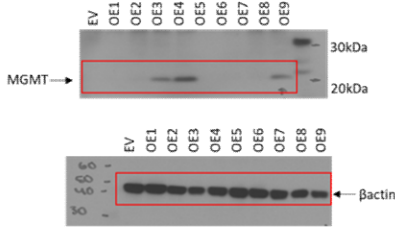

Supp. Fig 8f

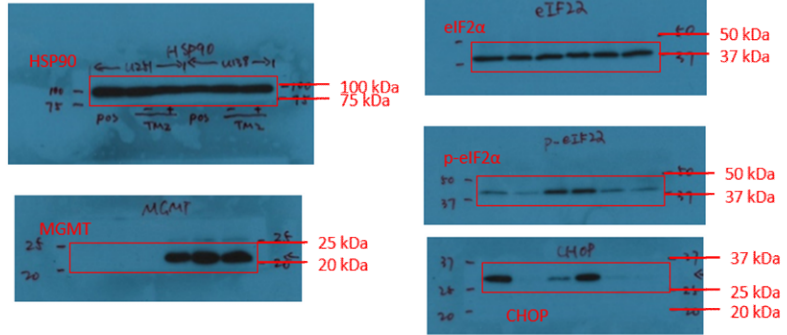

Supp. Fig. 9a

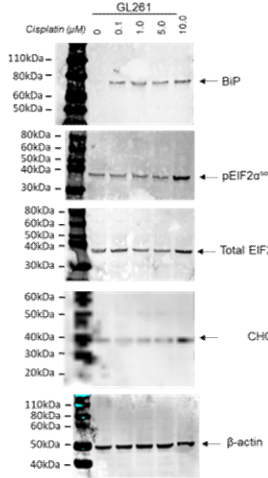

Supp. Fig. 9e

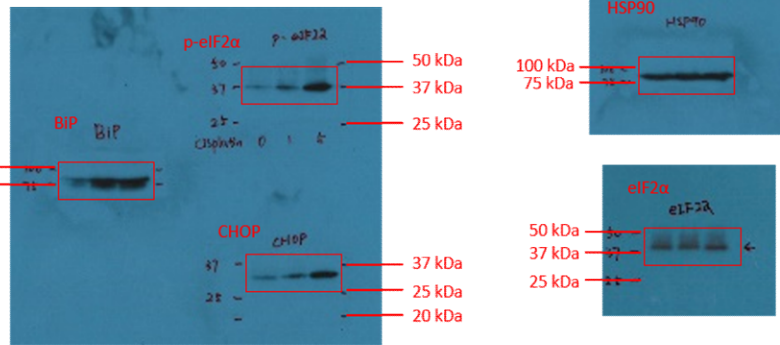

Supp. Fig 12

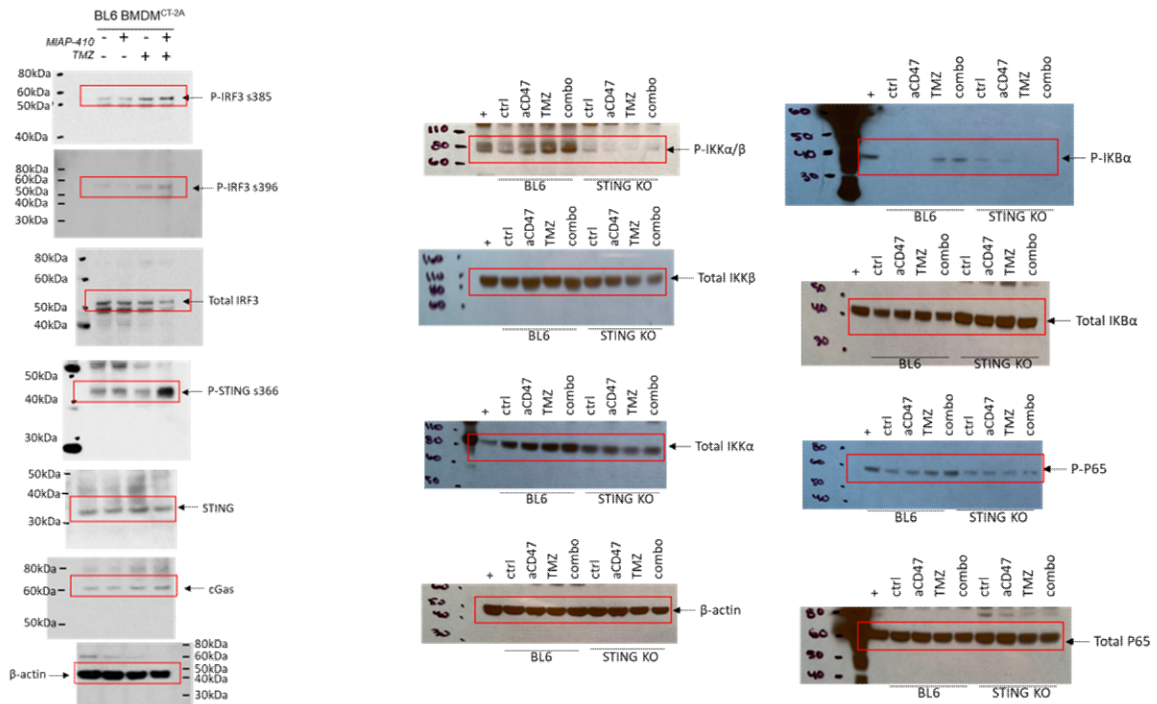

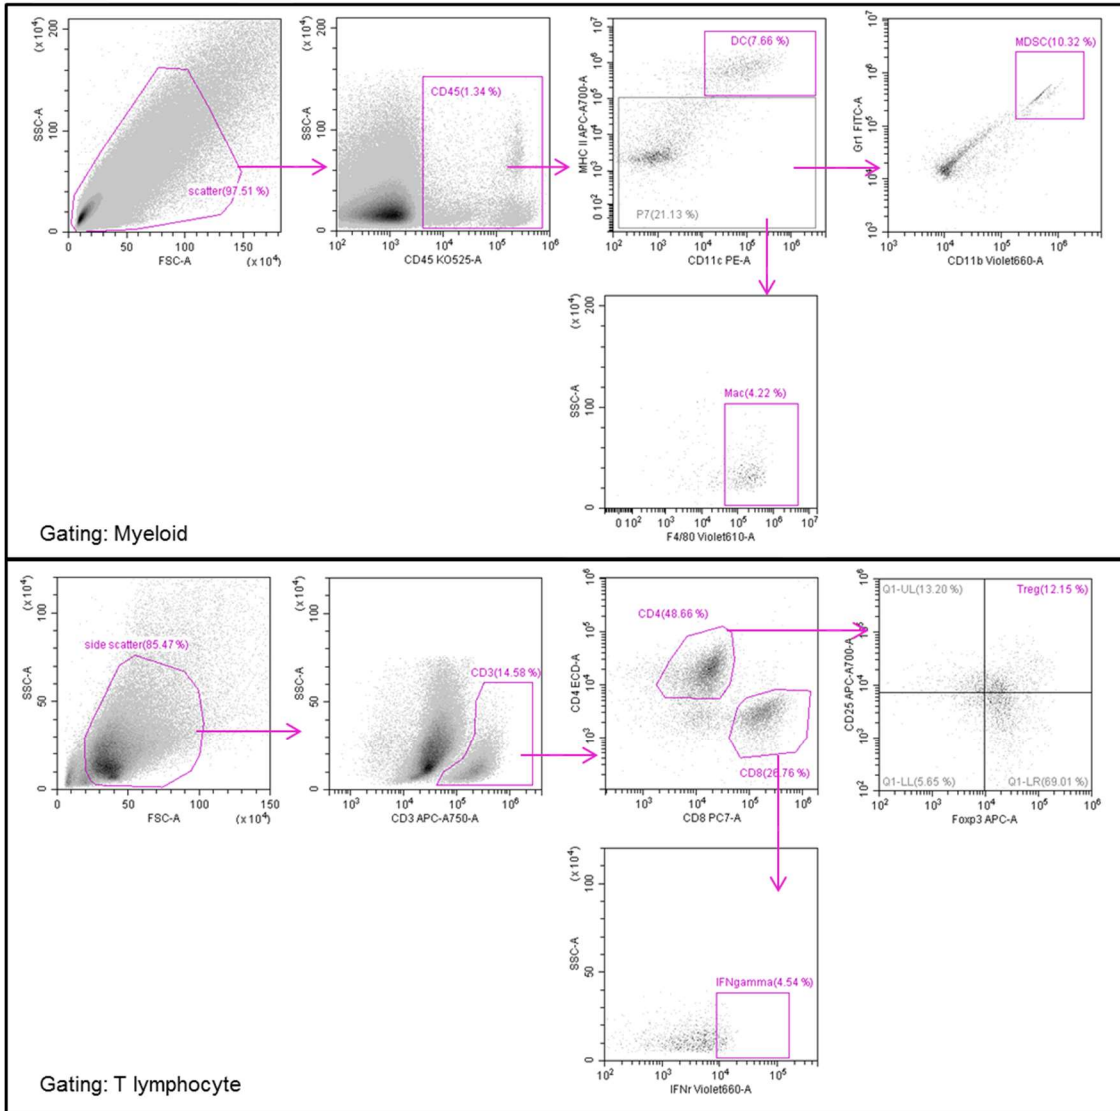

**Supplementary Figure 17:** Flow cytometry gating strategy for profiling myeloid and lymphoid cell populations.

**Supplementary Figure 18: Gating strategies for Flow cytometry experiments.**

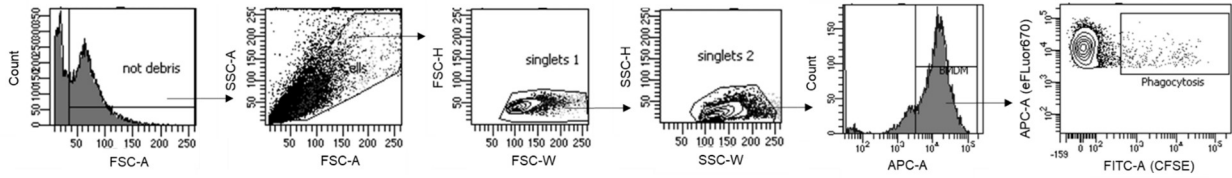

**Gating strategy used for phagocytosis.** Gating strategy to identify fraction of BMDM actively phagocytosing tumor cells following co-culture in response to drug treatment used in figures 1b, 2d, 2g, 3a-c and supplemental figures 2, 4, 8e, 8h, 9b, 9f-g.

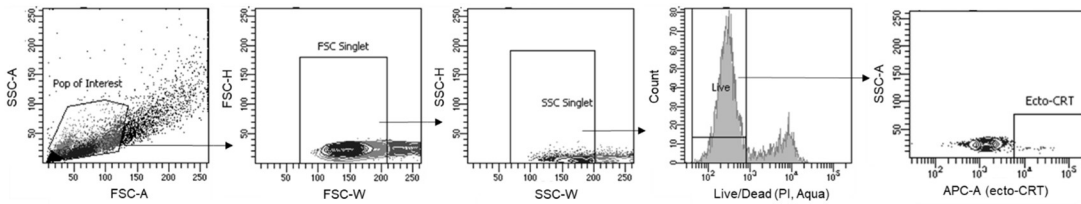

**Gating strategy used for calreticulin translocation.** Gating strategy to identify fraction of tumor cells expressing cell surface calreticulin in response to drug treatment used in figures 2a-c, 2g, and supplemental figures 8c-d, 8g, 9a, and 9d.

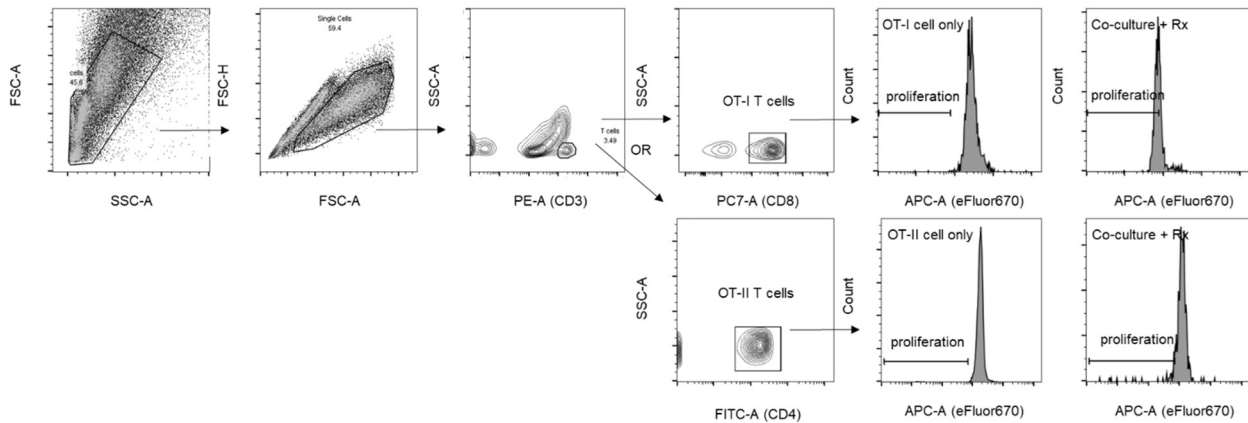

**Gating strategy used for OT-I and OT-II proliferation.** Gating strategy to identify fraction of proliferating T cells in response to co-culture with drug treated tumor and BMDM cells, used in figures 3h-i, and supplemental figure 11a.

**Supplementary Figure 18 (continued):** Gating strategies for Flow cytometry experiments.

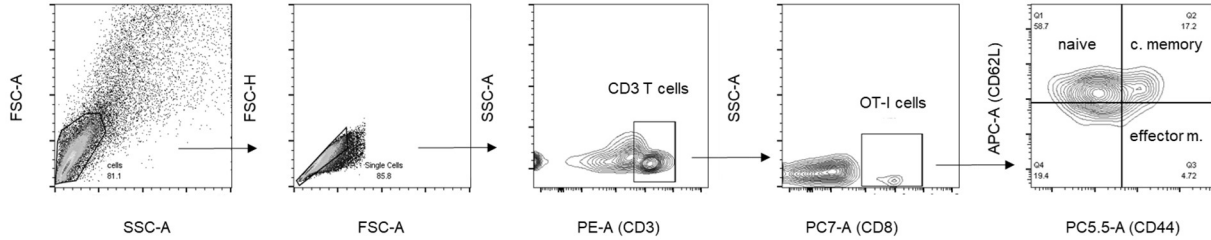

*Gating strategy used for OT-I T cell maturation.* Gating strategy to identify fraction of OT-I T cells that have matured from a naïve phenotype ( $CD62L^{hi}CD44^{lo}$ ) towards either a central memory ( $CD62L^{hi}CD44^{hi}$ ) or effector memory ( $CD62L^{lo}CD44^{hi}$ ) phenotype in response to co-culture with drug treated tumor and BMDM cells, used in supplemental figure 11b.

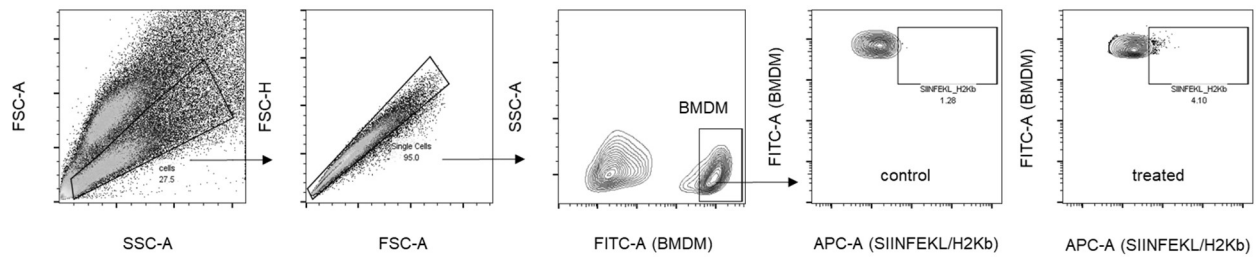

*Gating strategy used for antigen presentation.* Gating strategy to identify fraction of BMDM cells that express MHC I bound OVA protein (SIINFEKL/H2Kb) in response to co-culture with drug treated tumor cells, used in figures 3f-g.
